# Supplementary material for: Network pharmacology combined with metabolomics and lipidomics to reveal the hypolipidemic mechanism ofAlismatis rhizomain hyperlipidemic mice
Source: Royal Society of Chemistry journal article supplement (doi:10.1039/d1fo04386b), 2022-01-01
Supplement: d1fo04386b1.pdf [file d1fo04386b1.pdf]

**Network pharmacology combined with metabolomics and lipidomics to reveal  
the hypolipidemic mechanism of *Alismatis Rhizoma* in hyperlipidemic mice**

Pan Yan<sup>a</sup>, Yinyu Wei<sup>a</sup>, Meiqin Wang<sup>a</sup>, Jianmei Tao<sup>a</sup>, Hui Ouyang<sup>c</sup>, Zhifeng Du<sup>a</sup>, Sen  
Li<sup>b,\*</sup>, Hongliang Jiang<sup>a,\*</sup>

<sup>a</sup> Tongji School of Pharmacy, Huazhong University of Science and Technology, Wuhan  
430030, China;

<sup>b</sup> Department of Pharmacy, Union Hospital, Tongji Medical College, Huazhong  
University of Science and Technology, Wuhan 430030, China;

<sup>c</sup> Jiangxi University of Traditional Chinese Medicine, Nanchang 330000, China;

\*Corresponding author: Sen Li; E-mail: lisentome728@hotmail.com;

\*Corresponding author: Hongliang Jiang; E-mail: jianghongliang@hust.edu.cn;

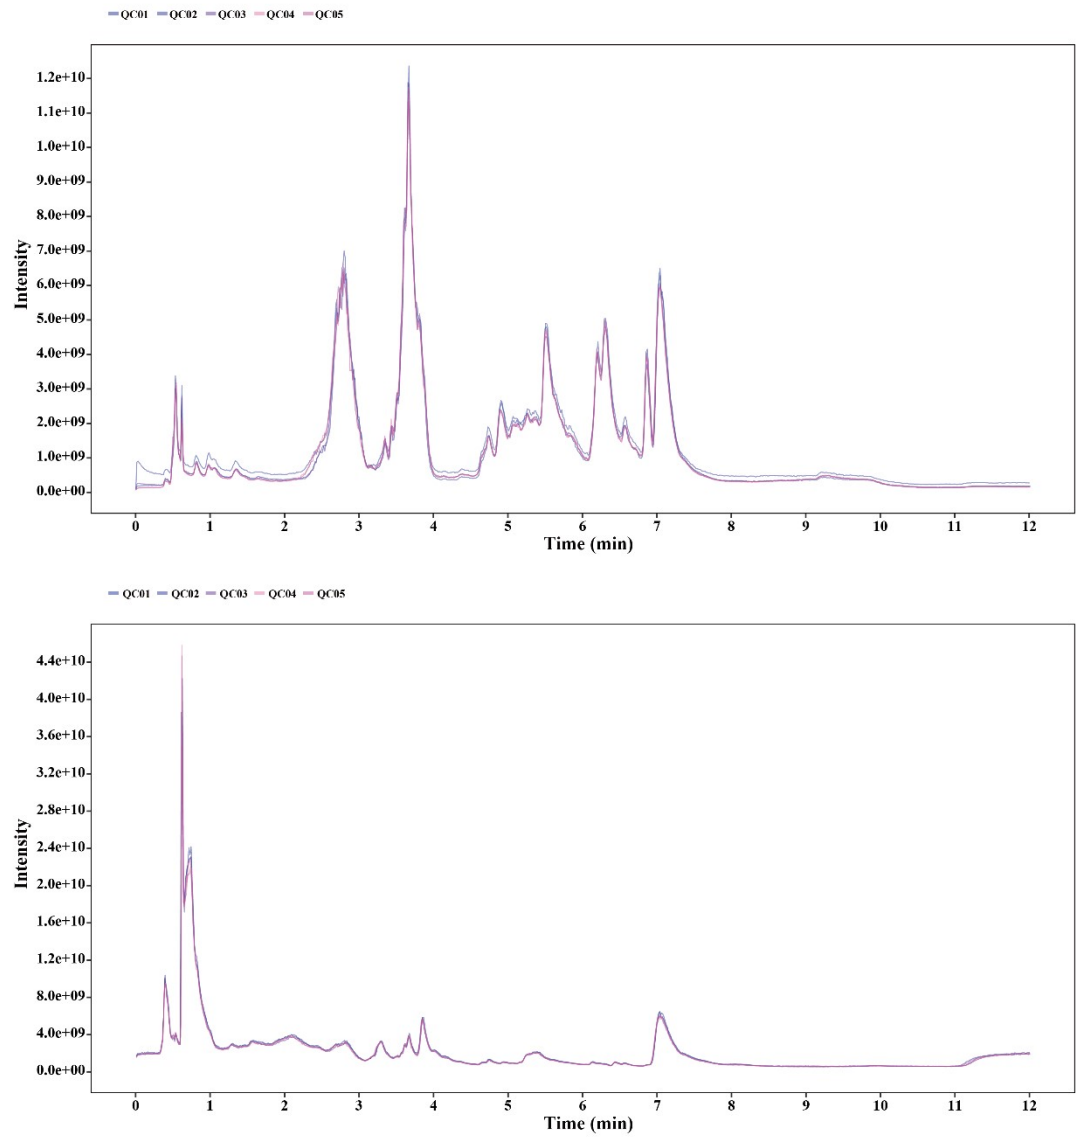

**Fig. S1.** The overlaid total ion chromatogram of QC in the metabolomics analysis. (A) Positive ion mode, (B) Negative ion mode.

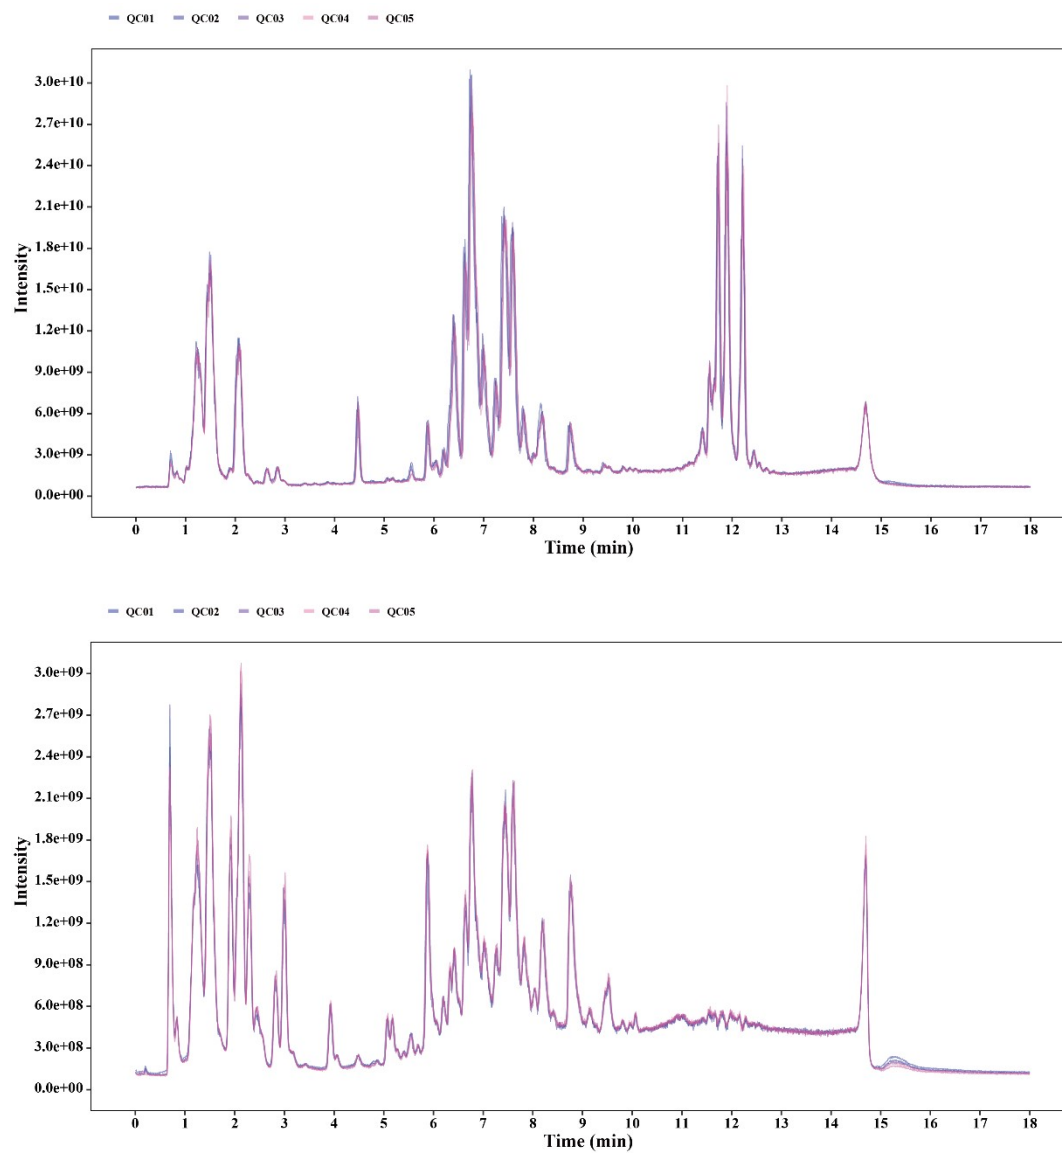

**Fig. S2.** The overlaid total ion chromatogram of QC in the lipidomics analysis. (A) Positive ion mode, (B) Negative ion mode.

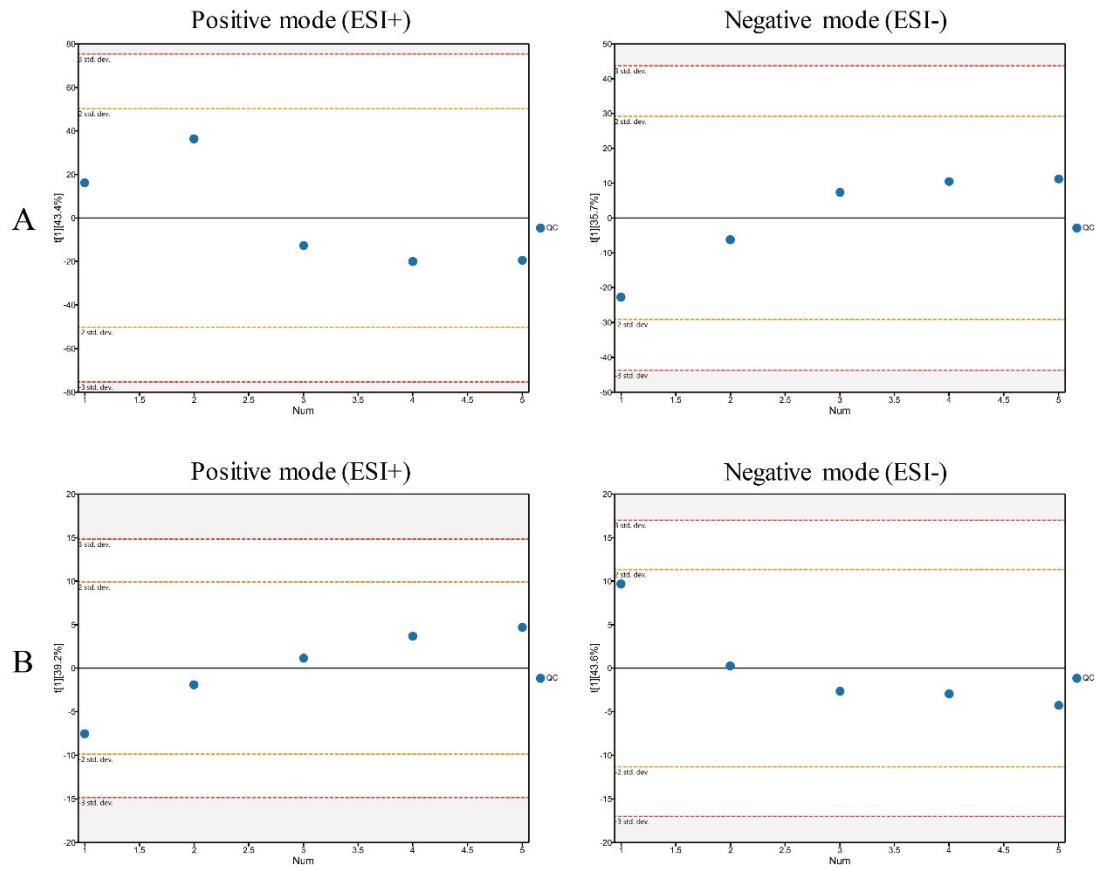

**Fig. S3.** PCA score plots of QC samples in the (A) metabolomics and the (B) lipidomics analyses.

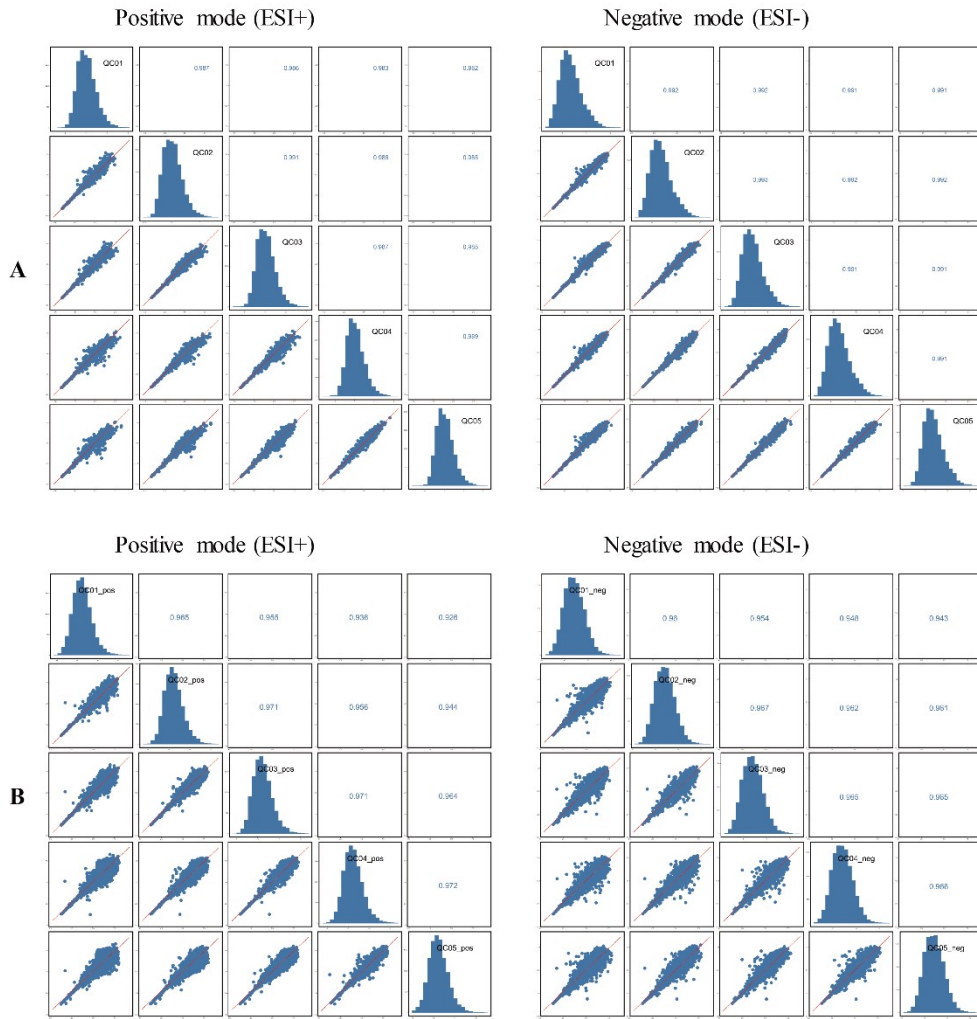

**Fig. S4.** The correlation of QC samples in the (A) metabolomics and the (B) lipidomics analyses.

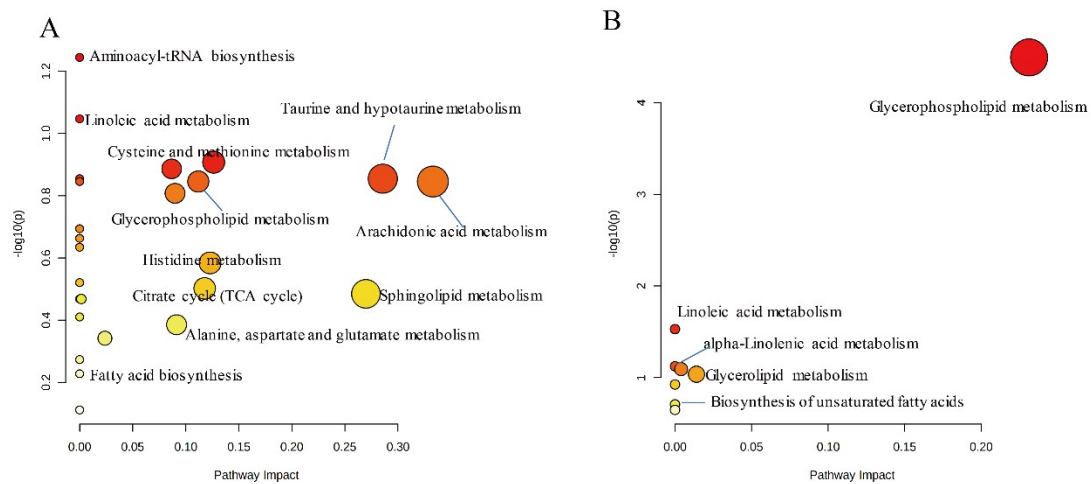

**Fig. S5.** Pathway analysis of differential metabolites (lipids) from the (A) metabolomics and the (B) lipidomics analyses.

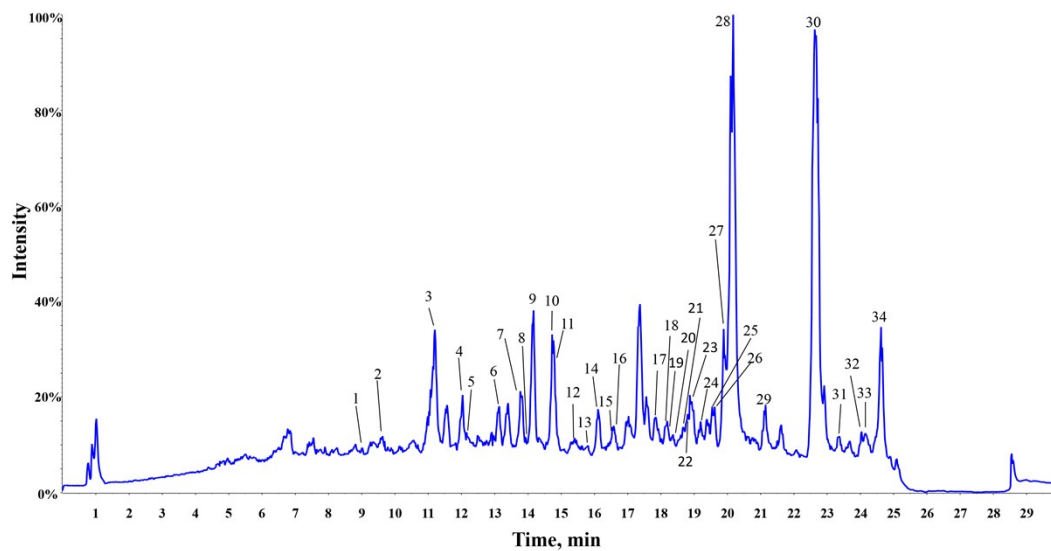

**Fig. S6.** The TIC of AR extracts in positive mode detected by UHPLC-Q-TOF/MS.

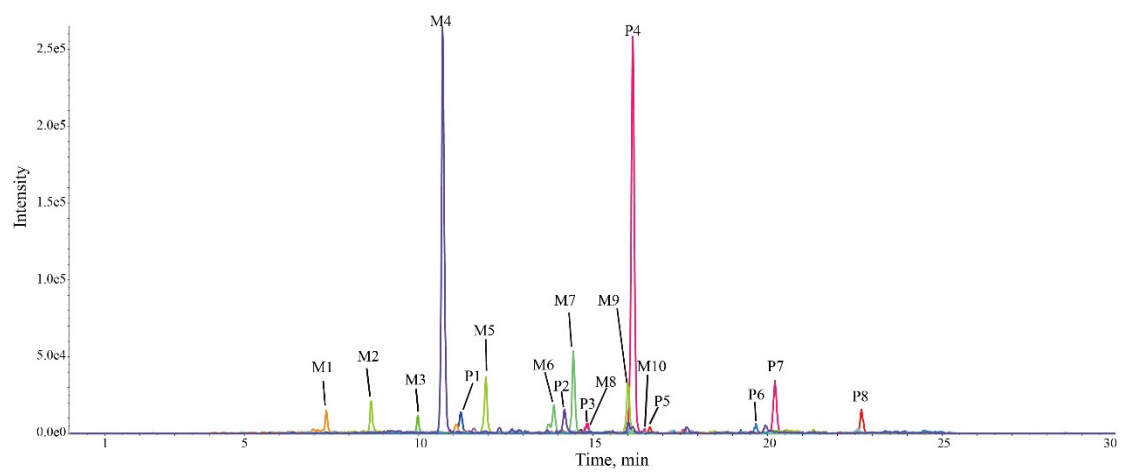

**Fig. S7.** The XIC of prototypes and metabolites detected in plasma after oral administration of AR.



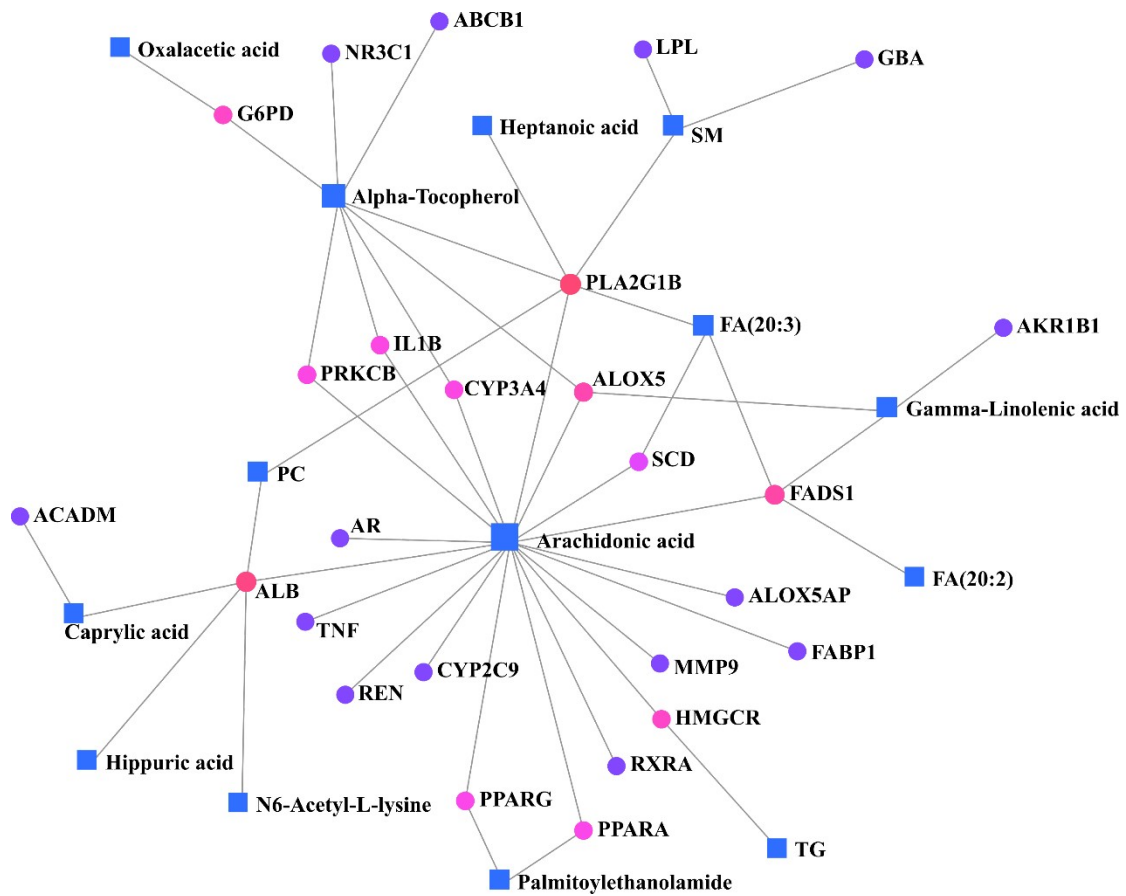

**Fig. S8.** Gene-Metabolite Interaction Network. The circles represent the genes and the rectangles represent the metabolites and lipids.

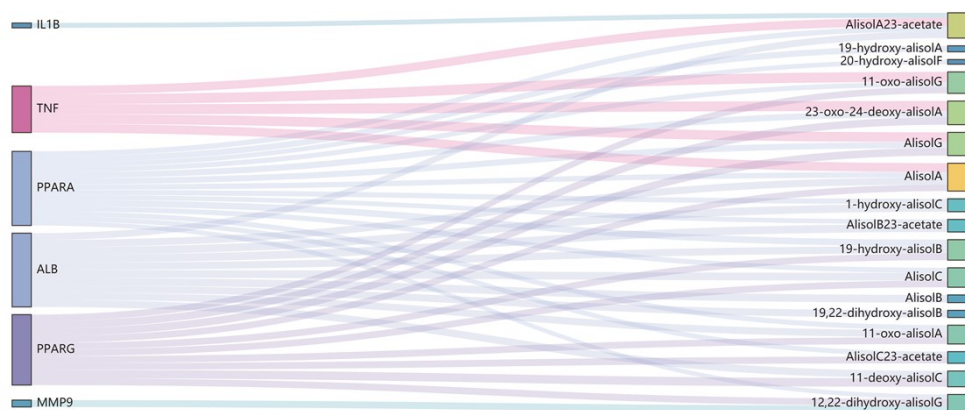

**Fig. S9.** Sankey diagram between the active compounds and correlated key targets. The thickness of the ribbon is negatively correlated with the docking score.

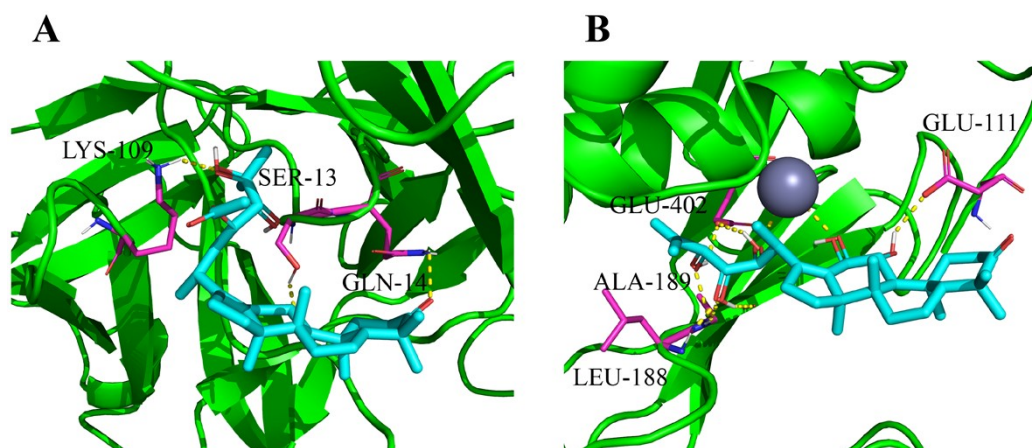

**Fig. S10.** Docking mode between the alisol A 23-acetate and IL1B (A); Docking mode between the 12,22-dihydroxy-alisol G and MMP9 (B).

**Table S1.** The nutritional composition of AR powder used in this study.

| <b>Composition</b> | <b>Content (per 100 g)</b> |
|--------------------|----------------------------|
| Water              | 10.1 g                     |
| Ashes              | 2.6 g                      |
| Fats               | 3.8 g                      |
| Proteins           | 22.8 g                     |
| Carbohydrates      | 60.7 g                     |
| Na                 | 16.9 mg                    |
| K                  | 788 mg                     |
| Mg                 | 942 mg                     |
| Energy             | 1560 kJ                    |

**Table S2.** The primer sequences for qPCR.

| <b>Gene</b>    | <b>Forward</b>         | <b>Reverse</b>         |
|----------------|------------------------|------------------------|
| PPARA          | TACTGCCGTTTTCACAAAGTGC | AGGTCGTGTTACACAGGTAAGA |
| PPARG          | CTCCAAGAATACCAAAGTGCGA | GCCTGATGCTTTATCCCCACA  |
| ALB            | CAGCGGAGCAACTGAAGACT   | AAGGTTTGGACCCTCAGTCG   |
| MMP9           | CTCTCCTGGCTTTCGGCTG    | TAGCGGTACAAGTATGCCTCTG |
| TNF            | CCCTCACACTCACAAACCAC   | ACAAGGTACAACCCATCGGC   |
| IL1B           | GCAGTGGTTCGAGGCCTAAT   | GCTGCTTCAGACACTTGCAC   |
| $\beta$ -actin | CACTGTCGAGTCGCGTCC     | TCATCCATGGCGAACTGGTG   |

**Table S3.** Food intake of mice fed with AR and simvastatin for 4 weeks.

| <b>Week</b> | <b>HFD</b><br><b>(g/mouse*day)</b><br><b>n=8</b> | <b>SIM</b><br><b>(g/mouse*day)</b><br><b>n=8</b> | <b>AR</b><br><b>(g/mouse*day)</b><br><b>n=8</b> |
|-------------|--------------------------------------------------|--------------------------------------------------|-------------------------------------------------|
| 1           | 6.42 ± 0.89                                      | 6.95 ± 1.63                                      | 6.75 ± 1.44                                     |
| 2           | 6.11 ± 0.67                                      | 6.81 ± 0.92                                      | 6.39 ± 0.95                                     |
| 3           | 5.53 ± 0.46                                      | 5.71 ± 0.76                                      | 5.97 ± 0.79                                     |
| 4           | 5.71 ± 0.93                                      | 5.92 ± 0.65                                      | 5.66 ± 0.81                                     |

**Table S4.** Metabolic pathways of AR against hyperlipidemia in metabolomics analysis.

| No | Pathway Name                                | Match Status | P-value  | Impact  |
|----|---------------------------------------------|--------------|----------|---------|
| 1  | Aminoacyl-tRNA biosynthesis                 | 3/48         | 0.056953 | 0       |
| 2  | Linoleic acid metabolism                    | 1/5          | 0.089683 | 0       |
| 3  | Cysteine and methionine metabolism          | 2/33         | 0.12363  | 0.1263  |
| 4  | Glycine, serine and threonine metabolism    | 2/34         | 0.1299   | 0.08668 |
| 5  | Valine, leucine and isoleucine biosynthesis | 1/8          | 0.13972  | 0       |
| 6  | Taurine and hypotaurine metabolism          | 1/8          | 0.13972  | 0.28571 |
| 7  | Biosynthesis of unsaturated fatty acids     | 2/36         | 0.14265  | 0       |
| 8  | Glycerophospholipid metabolism              | 2/36         | 0.14265  | 0.11182 |
| 9  | Arachidonic acid metabolism                 | 2/36         | 0.14265  | 0.33292 |
| 10 | Arginine and proline metabolism             | 2/38         | 0.15566  | 0.08992 |
| 11 | Phenylalanine metabolism                    | 1/12         | 0.20232  | 0       |
| 12 | alpha-Linolenic acid metabolism             | 1/13         | 0.21727  | 0       |
| 13 | Arginine biosynthesis                       | 1/14         | 0.23195  | 0       |
| 14 | Histidine metabolism                        | 1/16         | 0.26051  | 0.12295 |
| 15 | Pantothenate and CoA biosynthesis           | 1/19         | 0.30145  | 0       |
| 16 | Citrate cycle (TCA cycle)                   | 1/20         | 0.3146   | 0.11782 |
| 17 | Sphingolipid metabolism                     | 1/21         | 0.32752  | 0.26978 |
| 18 | Pentose phosphate pathway                   | 1/22         | 0.3402   | 0       |
| 19 | Pyruvate metabolism                         | 1/22         | 0.3402   | 0.00156 |
| 20 | Glycolysis / Gluconeogenesis                | 1/26         | 0.38865  | 0       |
| 21 | Alanine, aspartate and glutamate metabolism | 1/28         | 0.41157  | 0.09135 |
| 22 | Glyoxylate and dicarboxylate metabolism     | 1/32         | 0.45495  | 0.02381 |
| 23 | Valine, leucine and isoleucine degradation  | 1/40         | 0.53265  | 0       |
| 24 | Fatty acid biosynthesis                     | 1/47         | 0.59178  | 0       |
| 25 | Steroid hormone biosynthesis                | 1/77         | 0.77309  | 0       |

**Table S5.** Metabolic pathways of AR against hyperlipidemia in lipidomics analysis.

| No | Pathway Name                                            | Match Status | <i>P</i> -value | Impact  |
|----|---------------------------------------------------------|--------------|-----------------|---------|
| 1  | Glycerophospholipid metabolism                          | 4/36         | 3.1904E-5       | 0.23128 |
| 2  | Linoleic acid metabolism                                | 1/5          | 0.029564        | 0       |
| 3  | alpha-Linolenic acid metabolism                         | 1/13         | 0.075253        | 0       |
| 4  | Glycosylphosphatidylinositol (GPI)- anchor biosynthesis | 1/14         | 0.080828        | 0.00399 |
| 5  | Glycerolipid metabolism                                 | 1/16         | 0.091887        | 0.01402 |
| 6  | Sphingolipid metabolism                                 | 1/21         | 0.11902         | 0       |
| 7  | Arachidonic acid metabolism                             | 1/36         | 0.19615         | 0       |
| 8  | Biosynthesis of unsaturated fatty acids                 | 1/36         | 0.19615         | 0       |
| 9  | Steroid biosynthesis                                    | 1/42         | 0.22528         | 0       |



**Table S6.** Characterization of prototype compounds of AR extracts based on UHPLC-QTOF-MS/MS.

| No. | t <sub>R</sub><br>(min) | Formula                                        | Experimental<br>(m/z) | Calculated<br>(m/z) | Error<br>(ppm) | Characteristics ions | Identification                  |
|-----|-------------------------|------------------------------------------------|-----------------------|---------------------|----------------|----------------------|---------------------------------|
| 1   | 8.99                    | C <sub>30</sub> H <sub>48</sub> O <sub>6</sub> | 505.3524              | 505.3524            | 0.1            | 353.2465             | 16-oxo-Alisol A                 |
| 2   | 9.44                    | C <sub>32</sub> H <sub>50</sub> O <sub>7</sub> | 529.3489*             | 529.3465            | 4.5            | 353.2478             | 16-oxo-Alisol A 23-acetate      |
| 3   | 11.19                   | C <sub>30</sub> H <sub>46</sub> O <sub>5</sub> | 487.3420              | 487.3418            | 0.4            | 353.2482             | Alisol C                        |
| 4   | 12.02                   | C <sub>30</sub> H <sub>46</sub> O <sub>5</sub> | 487.3412              | 487.3418            | -1.2           | 353.2487             | 11-anhydro-16-oxo-Alisol A      |
| 5   | 12.16                   | C <sub>30</sub> H <sub>48</sub> O <sub>5</sub> | 489.3561              | 489.3575            | -2.8           | 355.2635             | 11-deoxy-16-oxo-Alisol A        |
| 6   | 13.13                   | C <sub>32</sub> H <sub>50</sub> O <sub>6</sub> | 513.3573*             | 513.3575            | -0.3           | 381.2788, 337.2526   | 16-acetoxy-Alisol B             |
| 7   | 13.80                   | C <sub>32</sub> H <sub>50</sub> O <sub>7</sub> | 547.3621              | 547.3629            | -1.5           | 381.2779, 337.2527   | 16-hroperoxyalisol B 23-acetate |
| 8   | 14.00                   | C <sub>30</sub> H <sub>48</sub> O <sub>5</sub> | 471.3465*             | 471.3469            | -0.8           | 381.2787, 339.2674   | Alisol F                        |
| 9   | 14.16                   | C <sub>32</sub> H <sub>48</sub> O <sub>6</sub> | 529.3525              | 529.3524            | 0.3            | 353.2484             | Alisol C 23-acetate             |
| 10  | 14.77                   | C <sub>30</sub> H <sub>46</sub> O <sub>4</sub> | 471.3466              | 471.3469            | -0.6           | 355.2637             | 11-deoxy-Alisol C               |
| 11  | 14.86                   | C <sub>30</sub> H <sub>44</sub> O <sub>4</sub> | 469.3314              | 469.3312            | 0.3            | 353.2474             | Alisol L                        |
| 12  | 15.29                   | C <sub>32</sub> H <sub>50</sub> O <sub>6</sub> | 513.3572*             | 513.3575            | -0.5           | 381.2787, 339.2684   | Alisol F 24-acetate             |
| 13  | 15.98                   | C <sub>32</sub> H <sub>46</sub> O <sub>6</sub> | 527.3341              | 527.3367            | -5.0           | 369.2449             | Alisol K 23-acetate             |
| 14  | 16.13                   | C <sub>30</sub> H <sub>50</sub> O <sub>5</sub> | 473.3621*             | 473.3625            | -0.9           | 383.2952, 339.2687   | Alisol A                        |
| 15  | 16.56                   | C <sub>30</sub> H <sub>46</sub> O <sub>4</sub> | 453.3366*             | 453.3363            | 0.6            | 381.2798, 339.2694   | 16,23-oxido-Alisol B            |
| 16  | 16.62                   | C <sub>32</sub> H <sub>52</sub> O <sub>6</sub> | 515.3729*             | 515.3731            | -0.4           | 383.2953, 339.2683   | Alisol A 23-acetate             |
| 17  | 17.97                   | C <sub>32</sub> H <sub>50</sub> O <sub>6</sub> | 531.3661              | 531.3680            | -3.6           | 355.2546             | Alismaketone A 23-acetate       |
| 18  | 18.15                   | C <sub>32</sub> H <sub>52</sub> O <sub>6</sub> | 515.3726              | 515.3731            | -1.0           | 383.2952, 339.2689   | Alisol A 24-acetate             |
| 19  | 18.20                   | C <sub>32</sub> H <sub>50</sub> O <sub>6</sub> | 531.3674              | 531.3680            | -1.2           | 355.2655             | Alisol D                        |
| 20  | 18.35                   | C <sub>32</sub> H <sub>46</sub> O <sub>5</sub> | 511.3403              | 511.3418            | -2.9           | 353.2472             | Alisol L 23-acetate             |
| 21  | 18.79                   | C <sub>32</sub> H <sub>50</sub> O <sub>6</sub> | 531.3677              | 531.3680            | -0.6           | 381.2785, 337.2522   | 16-hydroxy-Alisol B 23-acetate  |
| 22  | 18.80                   | C <sub>30</sub> H <sub>44</sub> O <sub>4</sub> | 469.3308              | 469.3312            | -0.9           | 379.2635, 339.2693   | Alismanol E                     |

**Table S6. (continued)**

| No. | t <sub>R</sub><br>(min) | Formula                                        | Experimental<br>(m/z) | Calculated<br>(m/z) | Error<br>(ppm) | Characteristics ions | Identification               |
|-----|-------------------------|------------------------------------------------|-----------------------|---------------------|----------------|----------------------|------------------------------|
| 23  | 18.90                   | C <sub>32</sub> H <sub>48</sub> O <sub>5</sub> | 513.3573              | 513.3575            | -0.3           | 355.2634             | 11-deoxy-Alisol C 23-acetate |
| 24  | 19.12                   | C <sub>30</sub> H <sub>46</sub> O <sub>4</sub> | 471.3459              | 471.3469            | -2.1           | 381.2790, 339.2669   | 24-deacetyl-Alisol O         |
| 25  | 19.62                   | C <sub>30</sub> H <sub>46</sub> O <sub>4</sub> | 471.3467              | 471.3469            | -0.4           | 381.2774, 339.2674   | 25-anhydro-Alisol F          |
| 26  | 19.63                   | C <sub>30</sub> H <sub>48</sub> O <sub>4</sub> | 455.3522*             | 455.3520            | 0.5            | 383.2949, 339.2684   | Alisol G                     |
| 27  | 19.89                   | C <sub>32</sub> H <sub>50</sub> O <sub>6</sub> | 531.3675              | 531.3680            | -1.0           | 355.2637             | Alisol N 23-actate           |
| 28  | 20.15                   | C <sub>30</sub> H <sub>48</sub> O <sub>4</sub> | 455.3513*             | 455.3520            | -1.5           | 383.2939, 339.2683   | Alisol B                     |
| 29  | 21.13                   | C <sub>32</sub> H <sub>48</sub> O <sub>5</sub> | 513.3574              | 513.3575            | -0.1           | 381.2795, 339.2680   | Alisol O                     |
| 30  | 22.66                   | C <sub>32</sub> H <sub>50</sub> O <sub>5</sub> | 515.3721              | 515.3731            | -1.9           | 383.2950, 339.2685   | Alisol B 23-acetate          |
| 31  | 23.35                   | C <sub>30</sub> H <sub>46</sub> O <sub>4</sub> | 471.3465              | 471.3469            | -0.8           | 381.2791, 339.2693   | Alismanol Q                  |
| 32  | 24.15                   | C <sub>30</sub> H <sub>46</sub> O <sub>3</sub> | 455.3519              | 455.3520            | -0.2           | 383.2942, 339.2677   | Alisol X                     |
| 33  | 24.18                   | C <sub>30</sub> H <sub>44</sub> O <sub>3</sub> | 453.3365              | 453.3363            | 0.4            | 381.2799, 339.2689   | 11,25-anhydro-Alisol F       |
| 34  | 24.64                   | C <sub>30</sub> H <sub>48</sub> O <sub>3</sub> | 457.3674              | 457.3676            | -0.5           | 385.3103, 341.2841   | 11-deoxy-Alisol B            |

\*: dehydrated form of compound was detected as the major peak in MS because dehydration in-source occurs easily, and the peak of undehydrated compound was too weak to get enough MS/MS fragments, therefore identification was based on MS/MS fragments of dehydrated form.

**Table S7.** Characterization of prototypes and metabolites of AR triterpenes in plasma based on UHPLC-QTOF-MS/MS.

| No. | Name                              | RT<br>(min) | Experimental<br>m/z | Calculated m/z | Error<br>(ppm) | Characteristic ions | Formula                                         |
|-----|-----------------------------------|-------------|---------------------|----------------|----------------|---------------------|-------------------------------------------------|
| P1# | Alisol C                          | 11.21       | 487.3413            | 487.3418       | -1.0           | 353.2496            | C <sub>30</sub> H <sub>46</sub> O <sub>5</sub>  |
| P2# | Alisol C 23-acetate               | 14.18       | 529.3518            | 529.3524       | -1.1           | 353.2485            | C <sub>32</sub> H <sub>48</sub> O <sub>6</sub>  |
| P3  | 11-deoxy alisol C                 | 14.81       | 471.3485            | 471.3469       | 3.4            | 355.2636            | C <sub>30</sub> H <sub>46</sub> O <sub>4</sub>  |
| P4# | Alisol A                          | 16.14       | 473.3625*           | 473.3626       | 0.1            | 383.2952, 339.2690  | C <sub>30</sub> H <sub>50</sub> O <sub>5</sub>  |
| P5# | Alisol A 23-acetate               | 16.63       | 515.3731*           | 515.3717       | -2.7           | 339.2688            | C <sub>32</sub> H <sub>52</sub> O <sub>6</sub>  |
| P6# | Alisol G                          | 19.67       | 455.3517*           | 455.3520       | -0.7           | 383.2935, 339.2728  | C <sub>30</sub> H <sub>48</sub> O <sub>4</sub>  |
| P7# | Alisol B                          | 20.21       | 455.3528*           | 455.3520       | 1.8            | 383.2954, 339.2683  | C <sub>30</sub> H <sub>48</sub> O <sub>4</sub>  |
| P8# | Alisol B 23-acetate               | 22.69       | 515.3731            | 515.3725       | 3.9            | 383.2964, 339.2696  | C <sub>32</sub> H <sub>50</sub> O <sub>5</sub>  |
| M1  | 1-hydroxy-alisol C                | 7.35        | 503.3362            | 503.3367       | -1.1           | 351.2315            | C <sub>30</sub> H <sub>46</sub> O <sub>6</sub>  |
| M2  | 20-hydroxy-alisol F               | 8.64        | 505.3517            | 505.3524       | -1.3           | 379.2631, 337.2559  | C <sub>30</sub> H <sub>48</sub> O <sub>6</sub>  |
| M3  | Alisol C 23-acetate-11-O-<br>GluA | 9.98        | 705.3810            | 705.3844       | -4.9           | 529.3494            | C <sub>38</sub> H <sub>56</sub> O <sub>12</sub> |
| M4  | 19-hydroxy-alisol A               | 10.70       | 507.3674            | 507.3680       | -1.2           | 381.2788, 337.2525  | C <sub>30</sub> H <sub>50</sub> O <sub>6</sub>  |
| M5  | 19,22-dihydroxy-alisol B          | 11.93       | 505.3518            | 505.3524       | -1.2           | 379.2593, 337.2492  | C <sub>30</sub> H <sub>48</sub> O <sub>6</sub>  |
| M6  | 11-oxo-alisol A                   | 13.71       | 489.3565            | 489.3574       | -1.9           | 355.2654            | C <sub>30</sub> H <sub>48</sub> O <sub>5</sub>  |
| M7  | 19-hydroxy-alisol B               | 14.43       | 489.3570            | 489.3574       | -1.0           | 381.2780, 337.2532  | C <sub>30</sub> H <sub>48</sub> O <sub>5</sub>  |
| M8  | 23-oxo-24-deoxy-alisol A          | 14.84       | 473.3613            | 473.3625       | -2.6           | 383.2978, 339.2641  | C <sub>30</sub> H <sub>48</sub> O <sub>4</sub>  |
| M9  | 12,22-dihydroxy-alisol G          | 15.99       | 505.3517            | 505.3524       | -1.4           | 355.2654            | C <sub>30</sub> H <sub>48</sub> O <sub>6</sub>  |
| M10 | 11-oxo-alisol G                   | 16.55       | 471.3467            | 471.3469       | -0.4           | 355.2627            | C <sub>30</sub> H <sub>46</sub> O <sub>4</sub>  |

\*: dehydrated form of compound was detected as the major peak in MS because dehydration in-source occurs easily, and the peak of undehydrated compound was too weak to get enough MS/MS fragments, therefore identification was based on MS/MS fragments of dehydrated form; P: prototypes; M: metabolites; #: confirmed with reference standards.

**Table S8.** The hub genes filtrated from PPI by CytoHubba.

| <b>Gene symbol</b> | <b>MCC</b> | <b>MNC</b> | <b>Degree</b> | <b>EPC</b> | <b>BottleNeck</b> | <b>EcCentricity</b> | <b>Closeness</b> | <b>Radiality</b> | <b>Betweenness</b> | <b>Stress</b> |
|--------------------|------------|------------|---------------|------------|-------------------|---------------------|------------------|------------------|--------------------|---------------|
| ALB                | 45823894   | 53         | 53            | 25.648     | 9                 | 0.33333             | 66.83333         | 4.71605          | 1037.153           | 5832          |
| TNF                | 45824123   | 51         | 52            | 25.037     | 33                | 0.25                | 66.08333         | 4.67901          | 878.288            | 4770          |
| PPARG              | 40423970   | 44         | 44            | 24.412     | 2                 | 0.25                | 62.08333         | 4.58025          | 468.5296           | 3146          |
| PPARA              | 131746     | 41         | 41            | 23.266     | 10                | 0.25                | 60.58333         | 4.54321          | 521.7559           | 3470          |
| EGFR               | 45692162   | 35         | 35            | 22.846     | 1                 | 0.25                | 57.41667         | 4.45679          | 304.0837           | 2304          |
| IL1B               | 45120696   | 33         | 33            | 21.808     | 1                 | 0.25                | 56.08333         | 4.40741          | 174.2581           | 1396          |
| IGF1               | 45691728   | 31         | 31            | 21.451     | 1                 | 0.25                | 55.41667         | 4.40741          | 133.3232           | 1172          |
| FASN               | 196256     | 28         | 28            | 20.366     | 2                 | 0.25                | 54.08333         | 4.38272          | 242.1478           | 1818          |
| ESR1               | 4974902    | 27         | 27            | 19.706     | 1                 | 0.25                | 53.25            | 4.34568          | 105.0921           | 888           |
| MMP9               | 45147050   | 25         | 25            | 18.952     | 2                 | 0.25                | 52.08333         | 4.30864          | 72.80311           | 600           |

**Table S9.** KEGG enrichment analysis of 83 genes.

| <b>No</b> | <b>Pathway</b>                               | <b>P-value</b> |
|-----------|----------------------------------------------|----------------|
| 1         | PPAR signaling pathway                       | 3.04E-08       |
| 2         | Regulation of lipolysis in adipocytes        | 1.9E-06        |
| 3         | Insulin resistance                           | 1.96E-06       |
| 4         | Prostate cancer                              | 3.96E-05       |
| 5         | AMPK signaling pathway                       | 4.67E-05       |
| 6         | HIF-1 signaling pathway                      | 6.94E-05       |
| 7         | Hepatitis C                                  | 8.15E-05       |
| 8         | Non-alcoholic fatty liver disease (NAFLD)    | 0.000198       |
| 9         | Pathways in cancer                           | 0.000244       |
| 10        | Proteoglycans in cancer                      | 0.000267       |
| 11        | Non-small cell lung cancer                   | 0.000313       |
| 12        | Renin secretion                              | 0.000585       |
| 13        | Calcium signaling pathway                    | 0.000625       |
| 14        | Estrogen signaling pathway                   | 0.000642       |
| 15        | Neuroactive ligand-receptor interaction      | 0.000699       |
| 16        | Bile secretion                               | 0.000827       |
| 17        | TNF signaling pathway                        | 0.000967       |
| 18        | PI3K-Akt signaling pathway                   | 0.001047       |
| 19        | Thyroid hormone signaling pathway            | 0.001407       |
| 20        | cGMP-PKG signaling pathway                   | 0.001462       |
| 21        | Ovarian steroidogenesis                      | 0.001813       |
| 22        | Ras signaling pathway                        | 0.00279        |
| 23        | mTOR signaling pathway                       | 0.003376       |
| 24        | Central carbon metabolism in cancer          | 0.004818       |
| 25        | Chagas disease (American trypanosomiasis)    | 0.005059       |
| 26        | Pancreatic cancer                            | 0.005092       |
| 27        | Glioma                                       | 0.005092       |
| 28        | cAMP signaling pathway                       | 0.005188       |
| 29        | Adipocytokine signaling pathway              | 0.006624       |
| 30        | Prolactin signaling pathway                  | 0.006963       |
| 31        | Rap1 signaling pathway                       | 0.007116       |
| 32        | Metabolism of xenobiotics by cytochrome P450 | 0.00805        |
| 33        | Aldosterone-regulated sodium reabsorption    | 0.008274       |
| 34        | Sphingolipid signaling pathway               | 0.009185       |
| 35        | Osteoclast differentiation                   | 0.0131         |
| 36        | Measles                                      | 0.013916       |
| 37        | ErbB signaling pathway                       | 0.01403        |
| 38        | Fatty acid metabolism                        | 0.014619       |
| 39        | Insulin signaling pathway                    | 0.016106       |
| 40        | Endometrial cancer                           | 0.018119       |
| 41        | Hepatitis B                                  | 0.019543       |

**Table S9** (*continued*)

| <b>No</b> | <b>Pathway</b>                                   | <b>P-value</b> |
|-----------|--------------------------------------------------|----------------|
| 42        | Inflammatory mediator regulation of TRP channels | 0.020852       |
| 43        | NOD-like receptor signaling pathway              | 0.022046       |
| 44        | Acute myeloid leukemia                           | 0.022046       |
| 45        | T cell receptor signaling pathway                | 0.022277       |
| 46        | Focal adhesion                                   | 0.022956       |
| 47        | Amoebiasis                                       | 0.026905       |
| 48        | Toll-like receptor signaling pathway             | 0.026905       |
| 49        | Arachidonic acid metabolism                      | 0.027557       |
| 50        | VEGF signaling pathway                           | 0.027557       |
| 51        | Apoptosis                                        | 0.02874        |
| 52        | Toxoplasmosis                                    | 0.030289       |
| 53        | Serotonergic synapse                             | 0.031172       |
| 54        | Inflammatory bowel disease (IBD)                 | 0.031186       |
| 55        | Transcriptional misregulation in cancer          | 0.033378       |
| 56        | Fc epsilon RI signaling pathway                  | 0.036395       |
| 57        | Drug metabolism - cytochrome P450                | 0.036395       |
| 58        | Complement and coagulation cascades              | 0.037763       |
| 59        | Linoleic acid metabolism                         | 0.038442       |
| 60        | Influenza A                                      | 0.038801       |
| 61        | Melanoma                                         | 0.040577       |
| 62        | Graft-versus-host disease                        | 0.048643       |
| 63        | African trypanosomiasis                          | 0.048643       |

**Table S10.** The docking scores between 6 key targets and the corresponding components.

| <b>Protein</b> | <b>PDB</b> | <b>Small molecule</b>    | <b>Docking score (kcal/mol)</b> |
|----------------|------------|--------------------------|---------------------------------|
| ALB            | 1AO6       | Alisol A                 | -7.8                            |
| ALB            | 1AO6       | 11-deoxy-alisol C        | -8.0                            |
| ALB            | 1AO6       | Alisol A 23-acetate      | -7.4                            |
| ALB            | 1AO6       | Alisol B                 | -8.4                            |
| ALB            | 1AO6       | Alisol B 23-acetate      | -8.6                            |
| ALB            | 1AO6       | Alisol C                 | -8.4                            |
| ALB            | 1AO6       | 1-hydroxy-alisol C       | -8.5                            |
| ALB            | 1AO6       | 19-hydroxy-alisol B      | -7.9                            |
| ALB            | 1AO6       | 19,22-dihydroxy-alisol B | -7.8                            |
| ALB            | 1AO6       | 11-oxo-alisol A          | -7.7                            |
| ALB            | 1AO6       | 19-hydroxy-alisol B      | -7.9                            |
| TNF            | 7KPA       | Alisol A                 | -9.6                            |
| TNF            | 7KPA       | Alisol A 23-acetate      | -9.1                            |
| TNF            | 7KPA       | Alisol G                 | -10.4                           |
| TNF            | 7KPA       | 23-oxo-24-deoxy-alisol A | -10.9                           |
| TNF            | 7KPA       | 11-oxo-alisol G          | -10.8                           |
| IL1B           | 1ITB       | Alisol A 23-acetate      | -5.3                            |
| MMP9           | 1GKC       | 12,22-dihydroxy-alisol G | -7.5                            |
| PPARG          | 6TSG       | Alisol A                 | -7.2                            |
| PPARG          | 6TSG       | Alisol C                 | -7.3                            |
| PPARG          | 6TSG       | Alisol C 23-acetate      | -7.4                            |
| PPARG          | 6TSG       | Alisol G                 | -8.3                            |
| PPARG          | 6TSG       | 11-deoxy-alisol C        | -9.2                            |
| PPARG          | 6TSG       | 19-hydroxy-alisol B      | -7.3                            |
| PPARG          | 6TSG       | 11-oxo-alisol A          | -7.4                            |
| PPARG          | 6TSG       | 23-oxo-24-deoxy-alisol A | -8.2                            |
| PPARG          | 6TSG       | 12,22-dihydroxy-alisol G | -7.4                            |
| PPARG          | 6TSG       | 11-oxo-alisol G          | -7.2                            |
| PPARA          | 5HYK       | Alisol A                 | -5.8                            |
| PPARA          | 5HYK       | Alisol A 23-acetate      | -5.8                            |
| PPARA          | 5HYK       | Alisol B 23-acetate      | -5.1                            |
| PPARA          | 5HYK       | Alisol C                 | -5.5                            |
| PPARA          | 5HYK       | Alisol C 23-acetate      | -5.3                            |
| PPARA          | 5HYK       | Alisol G                 | -6.6                            |
| PPARA          | 5HYK       | 1-hydroxy-alisol C       | -5.6                            |
| PPARA          | 5HYK       | 20-hydroxy-alisol F      | -5.1                            |
| PPARA          | 5HYK       | 19-hydroxy-alisol A      | -6.6                            |
| PPARA          | 5HYK       | 11-oxo-alisol A          | -5.4                            |

**Table S10** (*continued*)

| <b>Protein</b> | <b>PDB</b> | <b>Small molecule</b>    | <b>Docking score<br/>(kcal/mol)</b> |
|----------------|------------|--------------------------|-------------------------------------|
| PPARA          | 5HYK       | 19-hydroxy-alisol B      | -7.1                                |
| PPARA          | 5HYK       | 23-oxo-24-deoxy-alisol A | -6.7                                |
| PPARA          | 5HYK       | 12,22-dihydroxy-alisol G | -4.9                                |
| PPARA          | 5HYK       | 11-oxo-alisol G          | -5.4                                |
